# Supplementary material
Source: MDPI journal article supplement (https://www.mdpi.com/2304-6740/9/6/41)
Supplement: s1 [file s1]

Supplementary Materials

# Effects of Glymes on the Distribution of $\text{Mg}(\text{B}_{10}\text{H}_{10})$ and $\text{Mg}(\text{B}_{12}\text{H}_{12})$ from the Thermolysis of $\text{Mg}(\text{BH}_4)_2$

Ba L. Tran <sup>1</sup>, Tamara N. Allen <sup>2</sup>, Mark E. Bowden <sup>1</sup>, Tom Autrey <sup>1,\*</sup> and Craig M. Jensen <sup>2,\*</sup>

<sup>1</sup> Pacific Northwest National Laboratory, 902 Battelle Blvd, Richland, WA 99352, USA; ba.tran@pnnl.gov (B.L.T.); mark.bowden@pnnl.gov (M.E.B.)

<sup>2</sup> Department of Chemistry, University of Hawaii at Manoa, 2545 McCarthy Mall, Honolulu, HI 96822, USA; tamarana@hawaii.edu (T.N.A.)

\* Correspondence: tom.autrey@pnnl.gov (T.A.); jensen@hawaii.edu (C.M.J.); Tel.: +1-509-375-3792 (T.A.); +1-808-956-2769 (C.M.J.)

## TGA Results - 1:1 Monoglyme:MBH

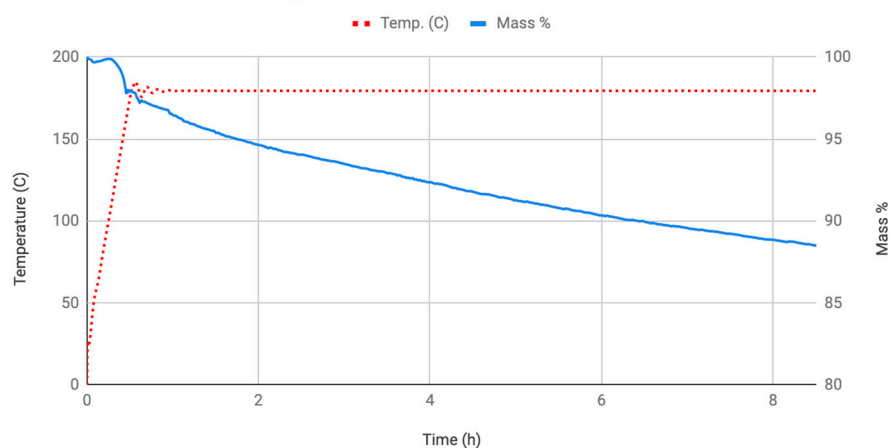

**Citation:** Tran, B.L.; Allen, T.N.; Bowden, M.E.; Autrey, T.; Jensen, C. M. Effects of Glymes on the Distribution of  $\text{Mg}(\text{B}_{10}\text{H}_{10})$  and  $\text{Mg}(\text{B}_{12}\text{H}_{12})$  from the Thermolysis of  $\text{Mg}(\text{BH}_4)_2$ . *Inorganics* **2021**, *9*, 41. <https://doi.org/10.3390/inorganics9060041>

Academic Editor: Robert C. Bowman, Jr.

Received: 17 April 2021

Accepted: 14 May 2021

Published: 23 May 2021

**Publisher's Note:** MDPI stays neutral with regard to jurisdictional claims in published maps and institutional affiliations.

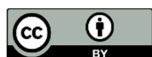

**Copyright:** © 2021 by the authors. Licensee MDPI, Basel, Switzerland. This article is an open access article distributed under the terms and conditions of the Creative Commons Attribution (CC BY) license (<http://creativecommons.org/licenses/by/4.0/>).

## DSC Results - 1:1 Monoglyme:MBH

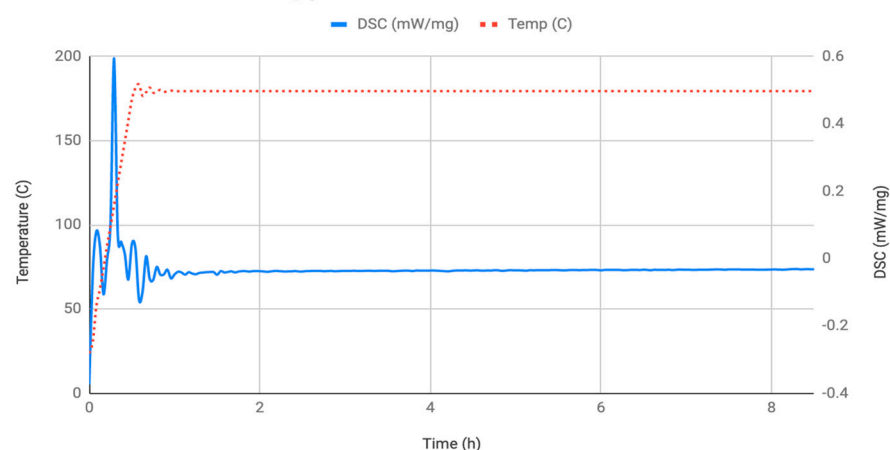

**Figure S1.** TGA-DSC data for the 1:1 reaction of G1 and  $\text{Mg}(\text{BH}_4)_2$ . Ramp rate 5K/min.

## TGA Results - 1:1 Diglyme:MBH

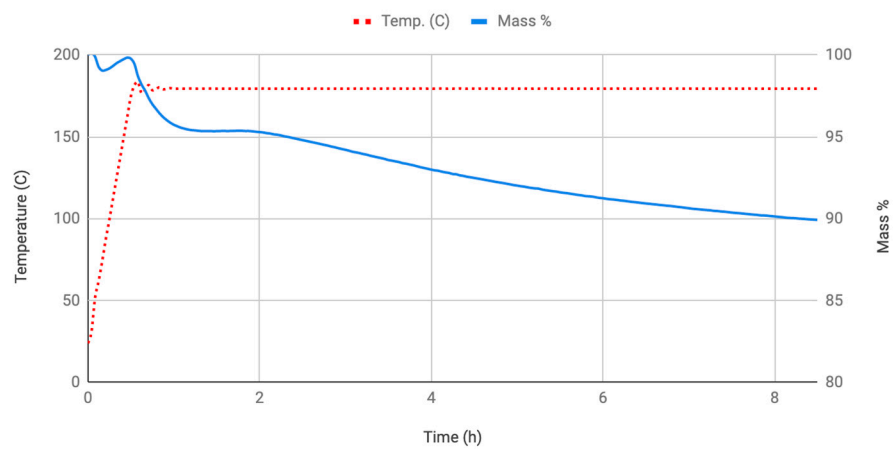

## DSC Results - 1:1 Diglyme:MBH

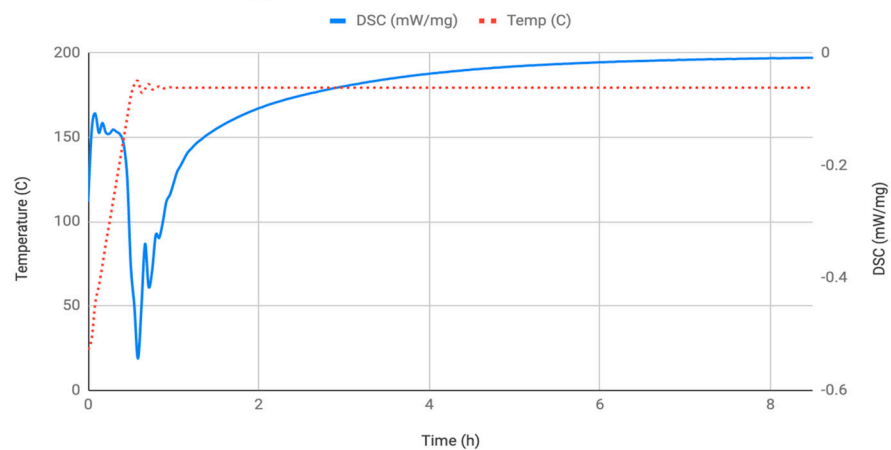

**Figure S2.** TGA-DSC data for the 1:1 reaction of G2 and  $\text{Mg}(\text{BH}_4)_2$ . Ramp rate 5K/min.

## TGA Results - 1:1 Triglyme:MBH

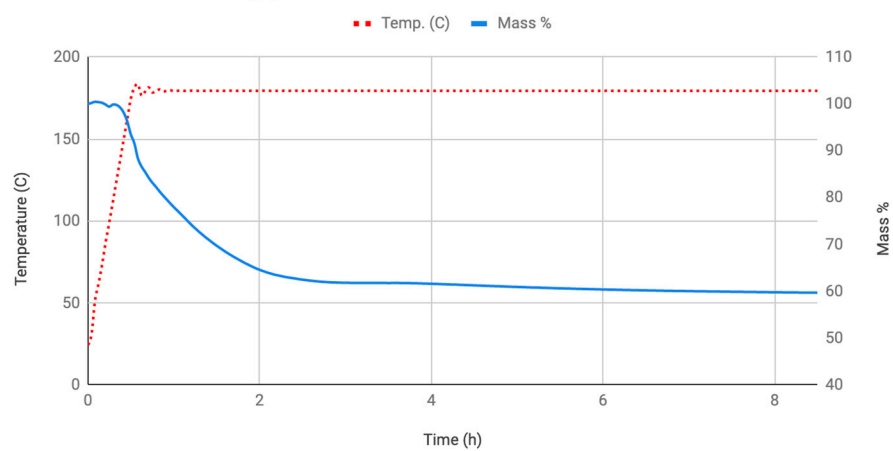

## DSC Results - 1:1 Triglyme:MBH

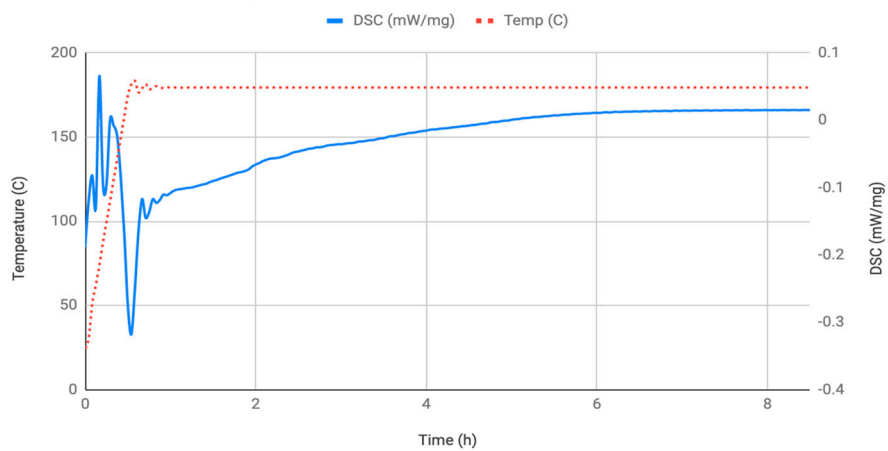

**Figure S3.** TGA-DSC data for the 1:1 reaction of G3 and  $\text{Mg}(\text{BH}_4)_2$ . Ramp rate 5K/min.

## TGA Results - 1:1 Tetraglyme:MBH

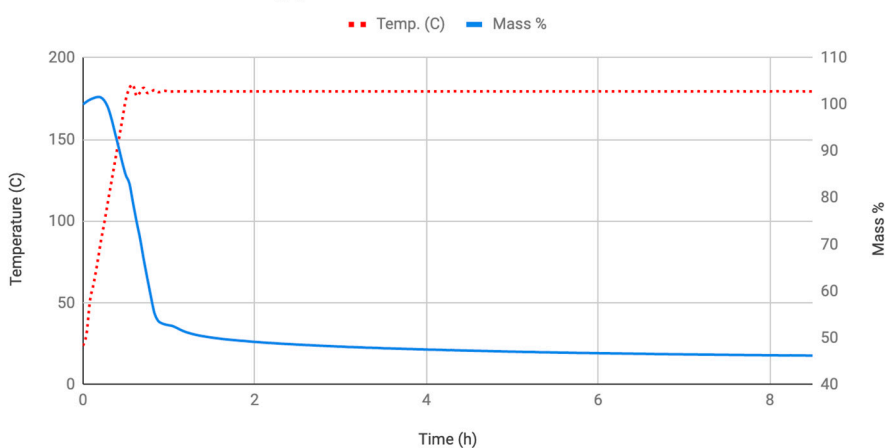

## DSC Results - 1:1 Tetraglyme:MBH

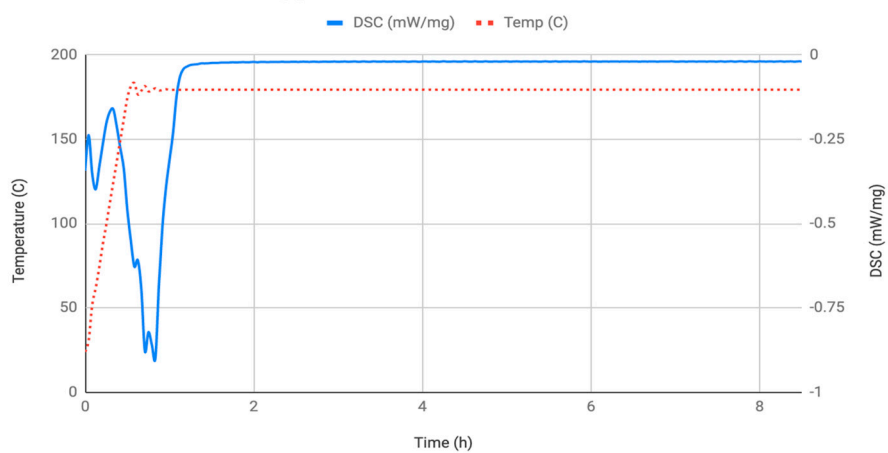

**Figure S4.** TGA-DSC data for the 1:1 reaction of G1 and  $\text{Mg}(\text{BH}_4)_2$ . Ramp rate 5K/min.
